# Supplementary material for: MODIS Collection 6 shortwave-derived cloud phase classification algorithm and comparisons with CALIOP
Source: Copernicus journal article supplement (doi:10.5194/amt-9-1587-2016), 2016-04-11

Supplement of Atmos. Meas. Tech., 9, 1587–1599, 2016  
<http://www.atmos-meas-tech.net/9/1587/2016/>  
doi:10.5194/amt-9-1587-2016-supplement  
© Author(s) 2016. CC Attribution 3.0 License.

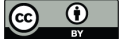

*Supplement of*

## **MODIS Collection 6 shortwave-derived cloud phase classification algorithm and comparisons with CALIOP**

**Benjamin Marchant et al.**

*Correspondence to:* Benjamin Marchant ([benjamin.marchant@nasa.gov](mailto:benjamin.marchant@nasa.gov))

The copyright of individual parts of the supplement might differ from the CC-BY 3.0 licence.

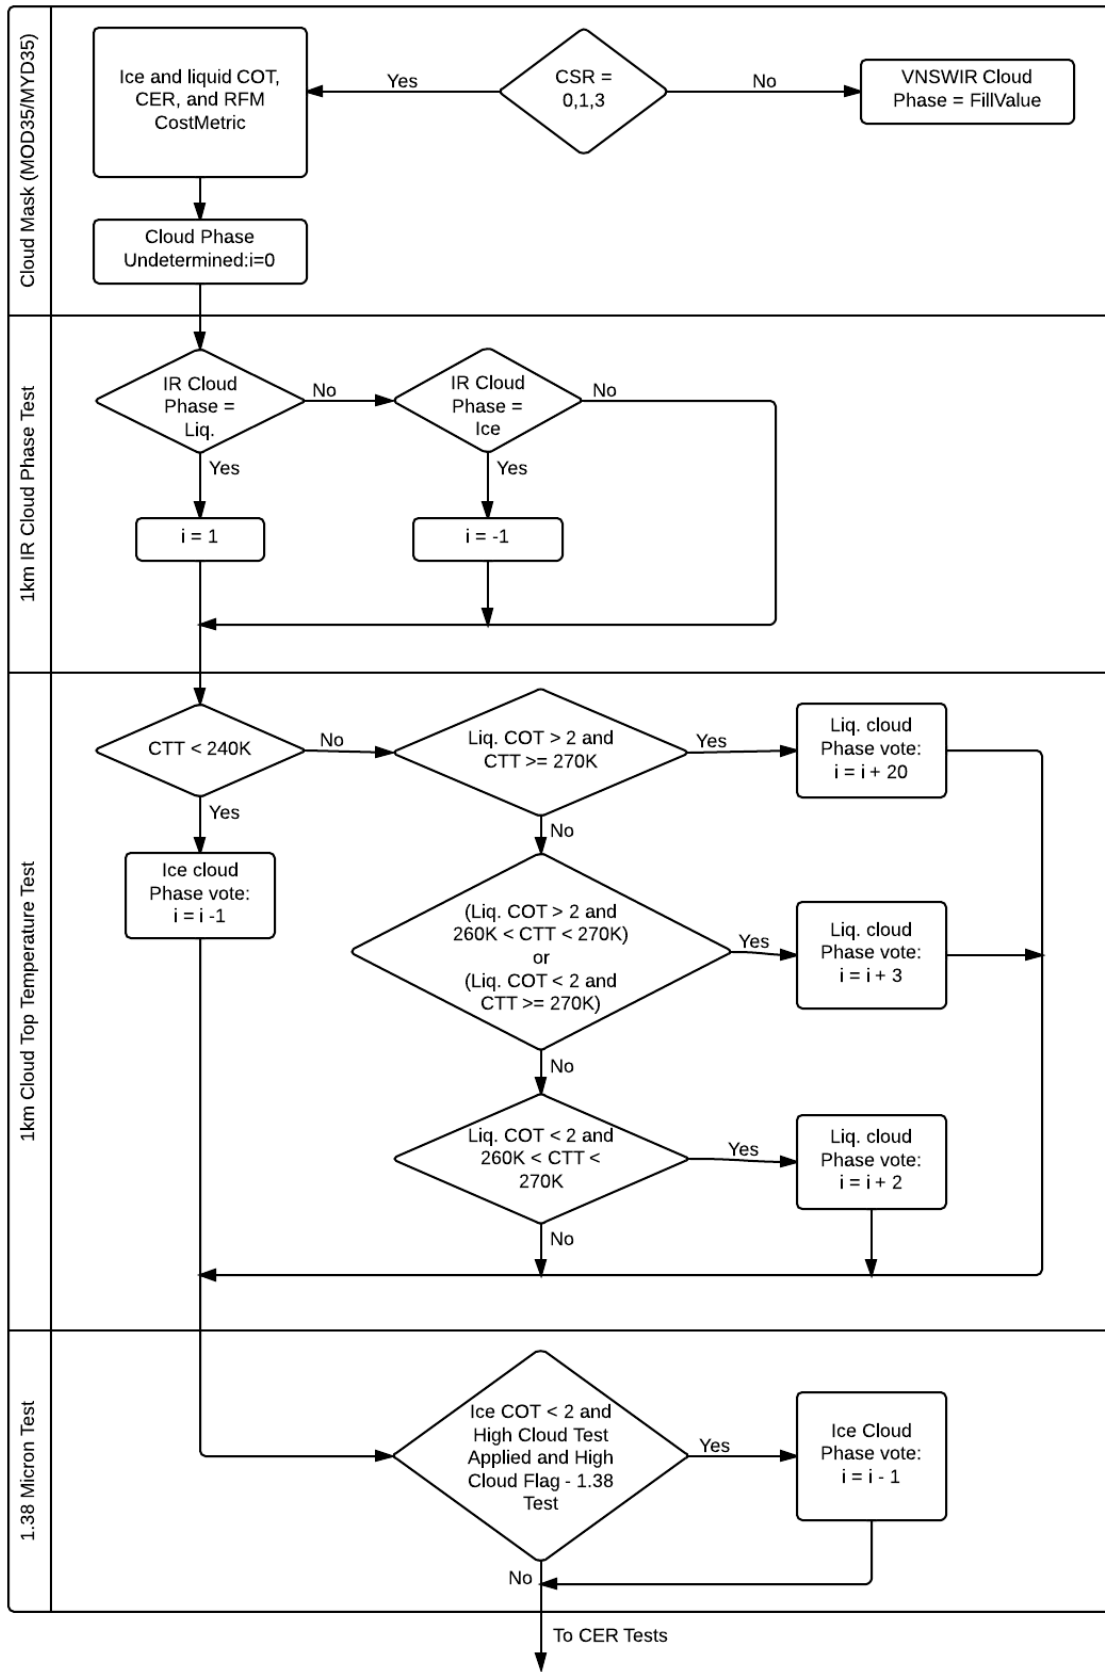

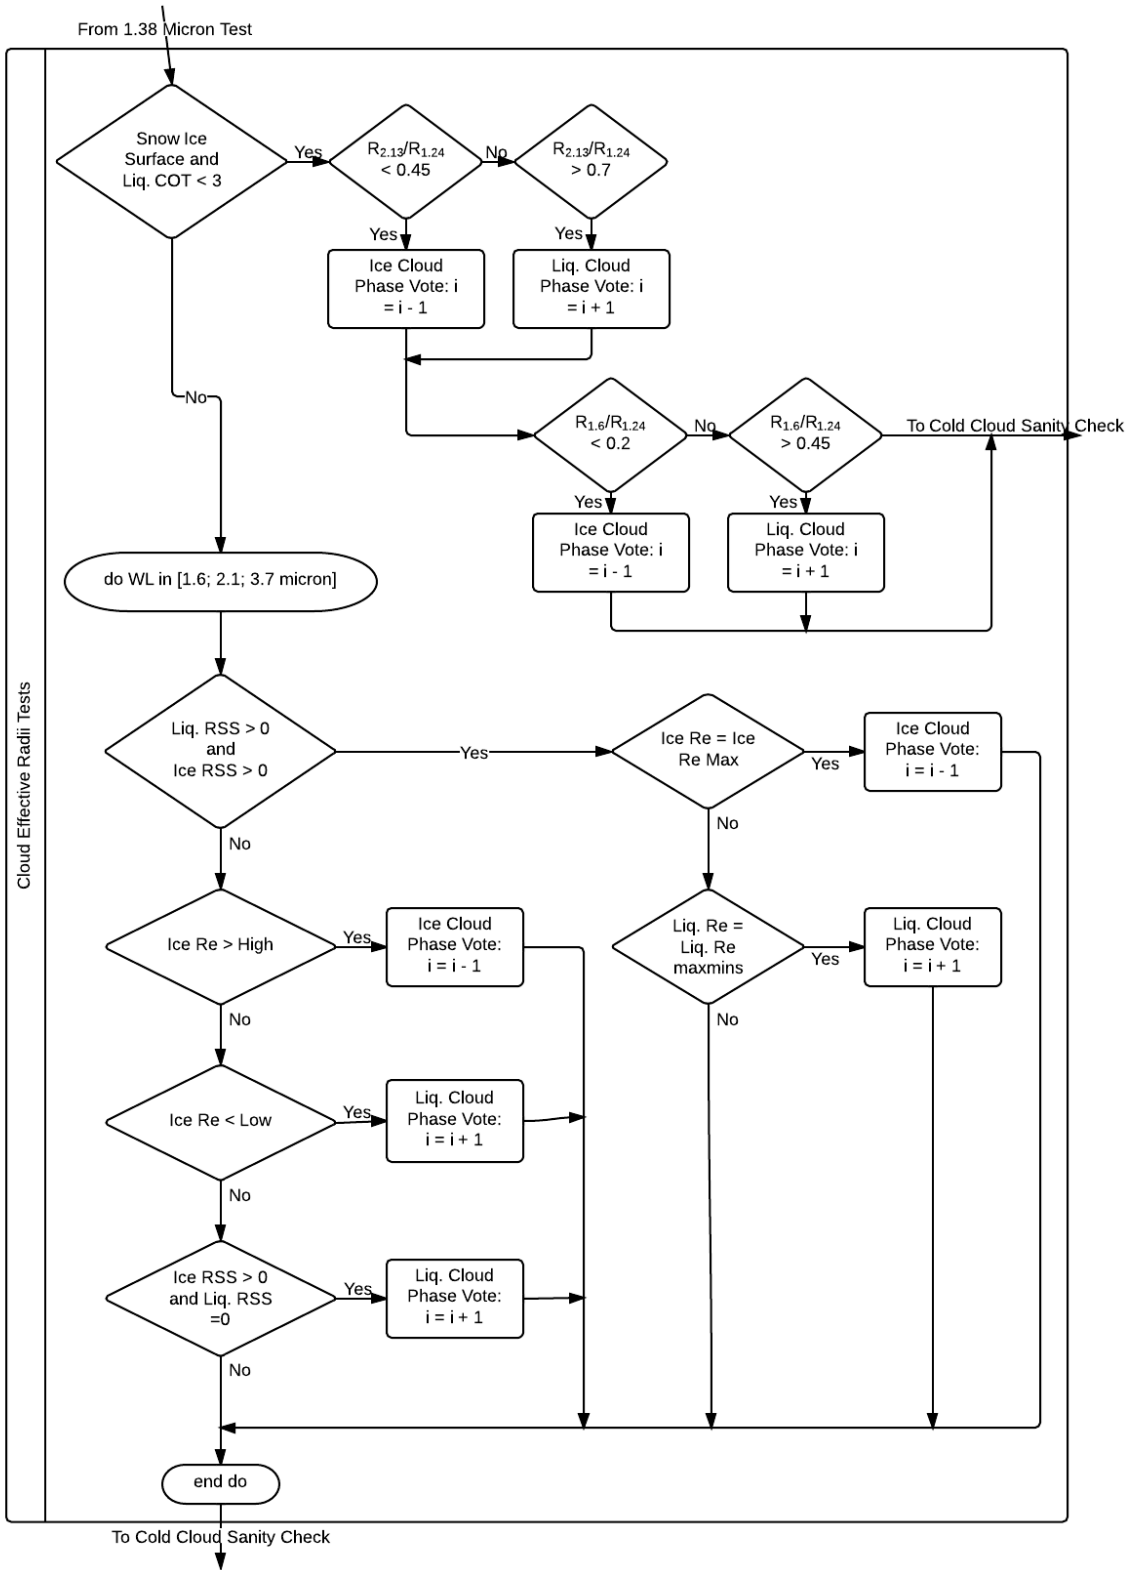

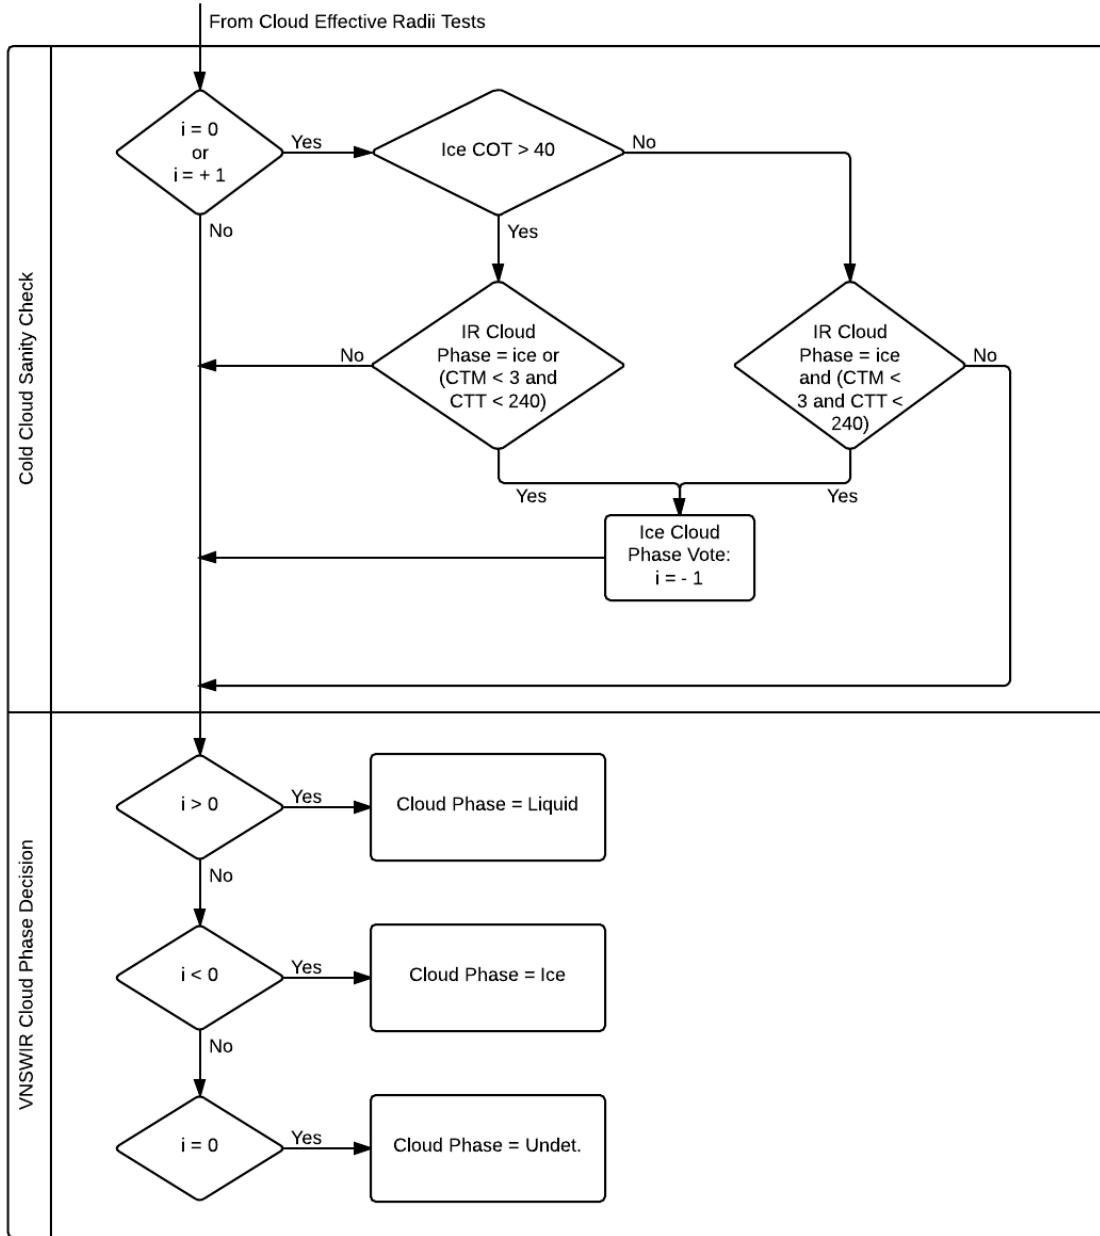

Supplement: Supplementary file [file amt-9-1587-2016-supplement.pdf]
